# Supplementary material
Source: publisher site journal article supplement (https://www.dovepress.com/article/137403)
Supplement: Supplementary file 1 [file get_supplementary_file.php]

## Supplementary material

Selected characteristics of the 49 included articles according to 32 IP indicators

| First author<br>(Country, Data source)<br>(Quality assessment)                                                                               | Study design                                                                                                                                                                                                    | Outcomes                                                                                                                             | Sample size                                 | Age:<br>mean age $\pm$ SD (years)    | Gender:<br>% of women | Follow-up:<br>mean (years) | Estimates<br>(95% CIs)                                                                                                                                                          | Notes                                                                                                                               |
|----------------------------------------------------------------------------------------------------------------------------------------------|-----------------------------------------------------------------------------------------------------------------------------------------------------------------------------------------------------------------|--------------------------------------------------------------------------------------------------------------------------------------|---------------------------------------------|--------------------------------------|-----------------------|----------------------------|---------------------------------------------------------------------------------------------------------------------------------------------------------------------------------|-------------------------------------------------------------------------------------------------------------------------------------|
| <b>Anticholinergics (no 1)</b>                                                                                                               |                                                                                                                                                                                                                 |                                                                                                                                      |                                             |                                      |                       |                            |                                                                                                                                                                                 |                                                                                                                                     |
| Huang et al <sup>25</sup><br>(China, Longitudinal Health Insurance database of the National Health Insurance Research Database)<br>(NOS 8/9) | Retrospective cohort study<br>Population: elder people aged > 65<br>Exposure: Potentially inappropriate anticholinergics vs no-potentially inappropriate one (the Anticholinergic Risk Scale was the criterion) | (1) Emergency visit<br>(2) Hospitalization<br>(3) Constipation<br>(4) Delirium<br>(5) Cardiac arrhythmia<br>(6) Cognitive impairment | 54,888 vs 17,668                            | 73.98 $\pm$ 6.51 vs 74.26 $\pm$ 7.01 | 56.83 vs 51.32        | 90.55 vs 144.64 (days)     | (1) <b>1.85 (1.76–1.95)</b><br>(2) <b>1.07 (1.01–1.13)</b><br>(3) <b>1.87 (1.72–2.03)</b><br>(4) <b>1.51 (1.18–1.93)</b><br>(5) <b>1.16 (1.05–1.28)</b><br>(6) 1.29 (0.89-1.88) | Number of events:<br>(1) 13398 vs 2154<br>(2) 9177 vs 2111<br>(3) 4985 vs 757<br>(4) 456 vs 78<br>(5) 2272 vs 503<br>(6) 185 vs. 34 |
| <b>In cardiovascular patients (no 2)</b>                                                                                                     |                                                                                                                                                                                                                 |                                                                                                                                      |                                             |                                      |                       |                            |                                                                                                                                                                                 |                                                                                                                                     |
| Uusvaara et al <sup>50</sup><br>(Finland, ad hoc data of previous RCT)<br>(NOS 6/9)                                                          | Prospective cohort study<br>Population: home-dwelling individuals aged 75-90 years with diagnosis of CardioV disease<br>Exposure: patients users of anticholinergic drugs vs nonusers                           | (1) Hospitalization<br>(2) Mortality                                                                                                 | 295 vs 105                                  | 80.7 $\pm$ 4.8 vs 78.4 $\pm$ 4.6     | 66 vs 63              | 3.3                        | (1) <b>2.08 (1.23–3.51)</b><br>(2) 1.57 (0.78-3.15)                                                                                                                             | Mortality: 20.7% vs 9.5%<br>Number of events:<br>(1) 242 vs 88<br>(2) 61 vs 10                                                      |
| <b>Antidepressants (no 3)</b>                                                                                                                |                                                                                                                                                                                                                 |                                                                                                                                      |                                             |                                      |                       |                            |                                                                                                                                                                                 |                                                                                                                                     |
| Blanchette et al <sup>12</sup><br>(USA, Medicare Current                                                                                     | Historical pooled cohort<br>Population: community                                                                                                                                                               | Acute MI                                                                                                                             | 1,814 vs 10,856<br>(1,052 SSRI; 762 others) | NA                                   | 66.5 and 68.4 vs 56.5 | 2                          | For SSRI:<br><b>1.85 (1.13–3.00)</b><br>For other antidepressants                                                                                                               |                                                                                                                                     |

|                                                                                                          |                                                                                                                                                                                 |                                                                                                                                                                                                                                                                              |                                                            |          |      |   |                                                                                                                                                                                                                                                                                                                                                                                                                                                                                                                                                                                                                                                                                                                                                                                                                                                                                                                                                                               |                                                                                                                                                                                                                                                                                                                                                                                                                                                                                                                             |
|----------------------------------------------------------------------------------------------------------|---------------------------------------------------------------------------------------------------------------------------------------------------------------------------------|------------------------------------------------------------------------------------------------------------------------------------------------------------------------------------------------------------------------------------------------------------------------------|------------------------------------------------------------|----------|------|---|-------------------------------------------------------------------------------------------------------------------------------------------------------------------------------------------------------------------------------------------------------------------------------------------------------------------------------------------------------------------------------------------------------------------------------------------------------------------------------------------------------------------------------------------------------------------------------------------------------------------------------------------------------------------------------------------------------------------------------------------------------------------------------------------------------------------------------------------------------------------------------------------------------------------------------------------------------------------------------|-----------------------------------------------------------------------------------------------------------------------------------------------------------------------------------------------------------------------------------------------------------------------------------------------------------------------------------------------------------------------------------------------------------------------------------------------------------------------------------------------------------------------------|
| Beneficiary Survey)<br>(NOS 8/9)                                                                         | residents who are ≥ 65 years<br>Exposure: users of antidepressant (SSRIs or other) vs nonusers                                                                                  |                                                                                                                                                                                                                                                                              |                                                            |          |      |   | 1.01 (0.52-1.96)                                                                                                                                                                                                                                                                                                                                                                                                                                                                                                                                                                                                                                                                                                                                                                                                                                                                                                                                                              |                                                                                                                                                                                                                                                                                                                                                                                                                                                                                                                             |
| Coupland et al <sup>15</sup><br>(UK, supplying data to the QResearch primary care database)<br>(NOS 8/9) | Cohort study<br>Population: patients with a diagnosis of depression and between the ages of 65 and 100 years<br>Exposure: antidepressants users (TCA, SSRI, others) vs nonusers | (1) All-cause mortality<br>(2) Attempted suicide/self-harm<br>(3) MI<br>(4) Stroke/transient ischaemic attack<br>(5) Falls<br>(6) Fractures<br>(7) Upper gastrointestinal bleeding<br>(8) Epilepsy/seizures<br>(9) Road traffic accidents<br>(10) ADRs<br>(11) Hyponatraemia | 54,038 vs 6,708<br>(TCA 21,043; SSRI 29,763; others 3,060) | 75 ± 7.6 | 66.7 | 1 | For TCA:<br><b>(1) 1.16 (1.10–1.22)</b><br><b>(2) 1.70 (1.28–2.25)</b><br>(3) 1.09 (0.96 – 1.23)<br>(4) 1.02 (0.93-1.11)<br><b>(5) 1.30 (1.23–1.38)</b><br><b>(6) 1.26 (1.16–1.37)</b><br><b>(7) 1.29 (1.10–1.51)</b><br>(8) 1.02 (0.76-1.38)<br>(9) 0.86 (0.64-1.15)<br>(10) 1.06 (0.86-1.29)<br>(11) 1.05 (0.87-1.27)<br><br>For SSRI:<br><b>(1) 1.54 (1.48–1.59)</b><br><b>(2) 2.16 (1.71–2.71)</b><br><b>(3) 1.15 (1.04–1.27)</b><br><b>(4) 1.17 (1.10–1.26)</b><br><b>(5) 1.66 (1.58–1.73)</b><br><b>(6) 1.58 (1.48–1.68)</b><br><b>(7) 1.22 (1.07–1.40)</b><br><b>(8) 1.83 (1.49–2.26)</b><br>(9) 0.89 (0.70-1.13)<br>(10) 1.16 (0.98-1.37)<br><b>(11) 1.52 (1.33–1.75)</b><br><br>For Others:<br><b>(1) 1.66 (1.56–1.77)</b><br><b>(2) 5.16 (3.90–6.83)</b><br>(3) 1.04 (0.85-1.27)<br><b>(4) 1.37 (1.22–1.55)</b><br><b>(5) 1.39 (1.28–1.52)</b><br><b>(6) 1.64 (1.46–1.84)</b><br><b>(7) 1.37 (1.08–1.74)</b><br><b>(8) 2.24 (1.60–3.15)</b><br>(9) 0.67 (0.39-1.14) | Number of events:<br>(1)<br>Non users: 8,210<br>TCA: 2,337<br>SSRIs: 5,782<br>Others: 1,268<br>(2)<br>Non users: 150<br>TCA: 89<br>SSRIs: 178<br>Others: 79<br>(3)<br>Non users: 1,264<br>TCA: 362<br>SSRIs: 614<br>Others: 110<br>(4)<br>Non users: 2,811<br>TCA: 791<br>SSRIs: 1,384<br>Others: 317<br>(5)<br>Non users: 5,208<br>TCA: 1,704<br>SSRIs: 3,575<br>Others: 631<br>(6)<br>Non users: 2,507<br>TCA: 809<br>SSRIs: 1,597<br>Others: 341<br>(7)<br>Non users: 671<br>TCA: 229<br>SSRIs: 365<br>Others: 79<br>(8) |

|                                                                                      |                                                                                                                                                                                    |                                                                                                             |                                                                                                       |             |            |    |                                                                                                                                                                                                                                                                                                                                                                                                                                                                                                                                                                              |                                                                                                                                                                                                                                                          |
|--------------------------------------------------------------------------------------|------------------------------------------------------------------------------------------------------------------------------------------------------------------------------------|-------------------------------------------------------------------------------------------------------------|-------------------------------------------------------------------------------------------------------|-------------|------------|----|------------------------------------------------------------------------------------------------------------------------------------------------------------------------------------------------------------------------------------------------------------------------------------------------------------------------------------------------------------------------------------------------------------------------------------------------------------------------------------------------------------------------------------------------------------------------------|----------------------------------------------------------------------------------------------------------------------------------------------------------------------------------------------------------------------------------------------------------|
|                                                                                      |                                                                                                                                                                                    |                                                                                                             |                                                                                                       |             |            |    | (10) 0.95 (0.68-1.34)<br>(11) 1.28 (0.98-1.67)                                                                                                                                                                                                                                                                                                                                                                                                                                                                                                                               | Non users: 223<br>TCA: 58<br>SSRIs: 177<br>Others: 39<br>(9)<br>Non users: 252<br>TCA: 56<br>SSRIs: 96<br>Others: 15<br>(10)<br>Non users: 417<br>TCA: 139<br>SSRIs: 231<br>Others: 37<br>(11)<br>Non users: 503<br>TCA: 155<br>SSRIs: 383<br>Others: 62 |
| Zivin et al <sup>57</sup><br>(USA, Veterans Health Administration data)<br>(NOS 7/9) | Cohort study<br>Population: patients with a diagnosis of depression and at least one citalopram or sertraline prescription<br>Exposure: users of citalopram vs users of sertraline | (1) Ventricular arrhythmia<br>(2) All-cause mortality<br>(3) Cardiac mortality<br>(4) Non-cardiac mortality | 618,450 vs 365,898<br>(patients 70-79 years: 71,187 vs 46,585; patients ≥ 80 years: 54,557 vs 33,487) | 56.9 ± 15.2 | 9.6 vs 9.9 | NA | Among patients aged 70–79 years, for citalopram:<br><b>(1) 5.52 (3.97–7.66)</b><br><b>(2) 5.99 (5.30–6.77)</b><br><b>(3) 28.60 (18.58–44.03)</b><br><b>(4) 4.16 (3.66–4.73)</b><br>For sertraline:<br><b>(1) 2.99 (2.13–4.21);</b><br><b>(2) 8.22 (6.89–9.82);</b><br><b>(3) 23.06 (14.27–37.25);</b><br><b>(4) 5.98 (4.94–7.24)</b><br>Among patients aged ≥80 years, for citalopram:<br><b>(1) 4.59 (3.28–6.41);</b><br><b>(2) 9.96 (8.81–11.25);</b><br><b>(3) 54.63 (35.50–84.05);</b><br><b>(4) 6.38 (5.62–7.26)</b><br>for sertraline:<br><b>(1) 2.75 (1.94–3.90);</b> |                                                                                                                                                                                                                                                          |

|                                                                                                                                       |                                                                                                                                                                                                                                                                   |                                                                                                                                                    |                                                                                               |                                                                                                                                                         |                                                          |             |                                                                                                                                           |                                                                                                   |  |
|---------------------------------------------------------------------------------------------------------------------------------------|-------------------------------------------------------------------------------------------------------------------------------------------------------------------------------------------------------------------------------------------------------------------|----------------------------------------------------------------------------------------------------------------------------------------------------|-----------------------------------------------------------------------------------------------|---------------------------------------------------------------------------------------------------------------------------------------------------------|----------------------------------------------------------|-------------|-------------------------------------------------------------------------------------------------------------------------------------------|---------------------------------------------------------------------------------------------------|--|
|                                                                                                                                       |                                                                                                                                                                                                                                                                   |                                                                                                                                                    |                                                                                               |                                                                                                                                                         |                                                          |             |                                                                                                                                           | (2) <b>13.57 (11.36–16.20);</b><br>(3) <b>41.81 (25.88–67.54);</b><br>(4) <b>9.33 (7.71–11.3)</b> |  |
| <b>In CAD patients (no 4)</b>                                                                                                         |                                                                                                                                                                                                                                                                   |                                                                                                                                                    |                                                                                               |                                                                                                                                                         |                                                          |             |                                                                                                                                           |                                                                                                   |  |
| Wu et al <sup>55</sup><br>(Taiwan, National Health Insurance Research database)<br>(Quality Assessment 8/9)                           | Case-crossover study<br>Population: patients with a hospitalization for a primary diagnosis of CerebroV event<br>Exposure: users of antipsychotics                                                                                                                | Hospitalization for CerebroV events                                                                                                                | 24,214<br>(16,258 aged ≥ 65 years)                                                            | 68.6 ± 12.0                                                                                                                                             | 48.30                                                    | 7-28 (days) | Among patients aged 65–75 years:<br><b>1.48 (1.30–1.68);</b><br>Among patients aged ≥75 years:<br><b>1.56 (1.37–1.78)</b>                 |                                                                                                   |  |
| <b>Antidiabetics (no 5)</b>                                                                                                           |                                                                                                                                                                                                                                                                   |                                                                                                                                                    |                                                                                               |                                                                                                                                                         |                                                          |             |                                                                                                                                           |                                                                                                   |  |
| Margolis et al <sup>37</sup><br>(UK, The Health Information Network THIN Data)<br>(NOS 7/9)                                           | Retrospective cohort study<br>Population: patients with at least two records for diabetes and at least 40 years old<br>Exposure: users of insulin or sulfonylureas or biguadine or meglitinide or thiazolidinediones or rosiglitazone or pioglitazone vs nonusers | Serious atherosclerotic vascular disease of the heart                                                                                              | 63,579<br>(15,514 patients aged 70-80 years;<br>6,930 patients aged >80 years)                | Aged between 40-50 years: 8,522;<br>between 50-60: 14,235;<br>between 60-70: 18,378;<br>between 70 and 80: 15,514;<br>>80: 6,930                        | 45.9%                                                    | 8.7 ± 7.5   | Among subjects aged 70–80 years:<br><b>3.3 (3.0–3.7)</b><br>Among subjects aged >80 years:<br><b>2.8 (2.5–3.2)</b>                        |                                                                                                   |  |
| Vanasse et al <sup>51</sup><br>(Canada, Québec’s provincial hospital discharge register and Québec’s provincial demographic database) | Nested case-control study<br>Population: diabetic patients aged ≥ 65 years<br>Exposure: users of rosiglitazone                                                                                                                                                    | (1) All cause death<br>(2) CV death<br>(3) Hospitalization for acute MI<br>(4) Hospitalization for congestive HF<br>(5) Hospitalization for stroke | 18,335 vs 370,866<br>4,455 vs 89,037<br>4,274 vs 85,480<br>4,274 vs 85,480<br>4,711 vs 94,209 | (1)77.8 ± 7.5 vs 76.9 ± 6.9<br>(2)78.2 ± 7.3 vs 77.3 ± 6.8<br>(3)76.5 ± 6.9 vs 75.1 ± 6.5<br>(4)75.6 ± 6.9 vs 75.1 ± 6.5<br>(5)75.7 ± 6.7 vs 72.2 ± 6.2 | (1) 49.5<br>(2) 49.6<br>(3) 48.5<br>(4) 52.4<br>(5) 49.6 | 2           | (1) <b>0.87 (0.76– 0.99)</b><br>(2) 0.88 (0.69-1.12)<br>(3) <b>1.41 (1.21–1.65)</b><br>(4) <b>1.94 (1.71–2.19)</b><br>(5)1.14 (0.97-1.34) | Number of events:<br>18,553<br>4,454<br>4,274<br>6,307<br>4,711                                   |  |

|                                                                                                                                                                                                           |                                                                                                                                                                                                                |                                                                                                                             |                                                  |              |                |                                              |                                                                                                                                                                                                        |                                                                                                                                                                            |
|-----------------------------------------------------------------------------------------------------------------------------------------------------------------------------------------------------------|----------------------------------------------------------------------------------------------------------------------------------------------------------------------------------------------------------------|-----------------------------------------------------------------------------------------------------------------------------|--------------------------------------------------|--------------|----------------|----------------------------------------------|--------------------------------------------------------------------------------------------------------------------------------------------------------------------------------------------------------|----------------------------------------------------------------------------------------------------------------------------------------------------------------------------|
| (NOS 6/9)                                                                                                                                                                                                 |                                                                                                                                                                                                                |                                                                                                                             |                                                  |              |                |                                              |                                                                                                                                                                                                        |                                                                                                                                                                            |
| Winkelmayer et al <sup>54</sup><br>(USA, New Jersey Pharmaceutical Assistance for the Aged and Disabled program and the Pennsylvania Pharmaceutical Assistance Contract for Elderly program)<br>(NOS 6/9) | Inception cohort study<br>Population: people > 65 years with state-sponsored prescription drug benefits who had diabetes mellitus<br>Exposure: patients initiated treatment with rosiglitazone vs pioglitazone | (1) All-cause mortality<br>(2) MI<br>(3) Stroke<br>(4) Hospitalization for congestive HF                                    | 14,101 vs 14,260                                 | 76.3         | 73.6 vs 74     | Median (mean): 215 (369) vs 217 (380) (days) | <b>(1) 1.15 (1.05–1.26)</b><br>(2) 1.08 (0.93-1.25)<br>(3) 1.07 (0.93-1.23)<br><b>(4) 1.13 (1.01–1.26)</b>                                                                                             | Events rates per 1000 person-year:<br>(1) 69.2 vs. 59.7<br>(2) 26.5 vs. 24.7<br>(3) 28.3 vs. 26.5<br>(4) 46.0 vs. 42.0                                                     |
| <b>In end-stage renal disease or disabled patients (no 6)</b>                                                                                                                                             |                                                                                                                                                                                                                |                                                                                                                             |                                                  |              |                |                                              |                                                                                                                                                                                                        |                                                                                                                                                                            |
| Graham et al <sup>22</sup><br>(USA, Medicare)<br>(NOS 7/9)                                                                                                                                                | Retrospective cohort study<br>Population: patients aged ≥ 65 years who have end-stage renal disease or are disabled<br>Exposure: new users of rosiglitazone vs new users of pioglitazone                       | (1) Acute MI<br>(2) stroke<br>(3) HF<br>(4) All-cause mortality<br>(5) Composite end point of acute MI, stroke, HF or death | 67,593 vs 159,978                                | 74.4         | 60.8% vs 59.5% | Median: 105 (days)                           | (1) 1.06 (0.96-1.18)<br><b>(2) 1.27 (1.12–1.45)</b><br><b>(3) 1.25 (1.16–1.34)</b><br><b>(4) 1.14 (1.05–1.24)</b><br><b>(5) 1.18 (1.12–1.23)</b>                                                       | Attributable risk per 100 person-years:<br>(1) 0.15 (-0.03 to 0.33)<br>(2) 0.32 (0.17-0.47)<br>(3) 0.94 (0.68-1.20)<br>(4) 0.45 (0.22-0.67)<br><b>(5) 1.68 (1.27-2.08)</b> |
| <b>Antipsychotics (no 7)</b>                                                                                                                                                                              |                                                                                                                                                                                                                |                                                                                                                             |                                                  |              |                |                                              |                                                                                                                                                                                                        |                                                                                                                                                                            |
| Franchi et al <sup>17</sup><br>(Italy, Drug Administration database of the Lombardy Region)<br>(NOS 6/9)                                                                                                  | Retrospective case-control study<br>Population: community-dwelling elderly patients aged between 65 and 94 years<br>Exposure: patients who were given at least two consecutive boxes                           | Hospital discharge diagnosis of CerebroV events                                                                             | 3,855 vs 15,420 (13,805 patients aged ≥75 years) | Range: 65-94 | 53.9%          | NA                                           | Considering prescriptions of at least 2 boxes of drugs:<br>For any antipsychotic vs non users: 1.09 (0.8-1.3);<br>For typical vs non users: 1.3 (0.9-1.9);<br>For atypical vs non users: 0.9 (0.7-1.2) |                                                                                                                                                                            |

|                                                                                                                                                           |                                                                                                                                            |                                                                                                                               |                                    |                          |              |            |                                                                                                                                                                                                                                                                               |                                                                                                                                                                   |
|-----------------------------------------------------------------------------------------------------------------------------------------------------------|--------------------------------------------------------------------------------------------------------------------------------------------|-------------------------------------------------------------------------------------------------------------------------------|------------------------------------|--------------------------|--------------|------------|-------------------------------------------------------------------------------------------------------------------------------------------------------------------------------------------------------------------------------------------------------------------------------|-------------------------------------------------------------------------------------------------------------------------------------------------------------------|
|                                                                                                                                                           | of antipsychotics (any, typical, atypical)                                                                                                 |                                                                                                                               |                                    |                          |              |            | Considering prescriptions of at least 19 boxes of drugs:<br>For any antipsychotic vs non users: 1.3 (0.86 – 2.03)<br>For typical antipsychotics vs non users:<br><b>2.4 (1.08–5.5)</b><br>For atypical vs non users: 0.93 (0.53 – 1.62)                                       |                                                                                                                                                                   |
| Gisev et al <sup>21</sup><br>(Finland, Finnish National Prescription Register and the Special Reimbursement Register)<br>(NOS 8/9)                        | Retrospective cohort study<br>Population: community-dwelling older adults (≥ 65 years)<br>Exposure: users of antipsychotics vs nonusers    | Mortality                                                                                                                     | 139 vs 2,085                       | 76.7 ± 7.4 vs 74.1 ± 6.8 | 70.5 vs 57.9 | 9          | <b>2.07 (1.73–2.47)</b>                                                                                                                                                                                                                                                       |                                                                                                                                                                   |
| Pratt et al <sup>42</sup><br>(Australia, Australian Government Department of Veterans' Affairs administrative claims dataset)<br>(Quality Assessment 8/8) | Self-controlled case series<br>Population: elderly users of antipsychotics aged ≥ 65 years<br>Exposure: users of antipsychotic vs nonusers | Hospitalization for stroke after<br>(1) 1 week<br>(2) 2-4 weeks<br>(3) 5-8 weeks and<br>(4) 8 or more weeks of treatment      | 514 typical, 564 atypical vs 9,560 | ≥ 65 years               | NA           | NA         | For typical antipsychotics:<br><b>(1) 2.25 (1.32–3.83)</b><br>(2) 0.61 (0.33-1.13)<br><b>(3) 1.62 (1.14–2.32)</b><br>(4) 0.82 (0.61-1.11)<br><br>For atypical antipsychotics:<br>(1) 1.46 (0.83-2.56)<br>(2) 0.94 (0.62-1.43)<br>(3) 1.14 (0.80-1.64)<br>(4) 0.86 (0.69-1.08) | Number of events:<br>For typical antipsychotics:<br>(1) 8<br>(2) 6<br>(3) 19<br>(4) 40<br><br>For atypical antipsychotics:<br>(1) 7<br>(2) 13<br>(3) 18<br>(4) 79 |
| Setoguchi et al <sup>48</sup><br>(USA, General practice database)<br>(NOS 6/9)                                                                            | Cohort study<br>Population: British Columbia residents aged ≥ 65 years who were new users of antipsychotics                                | (1) Overall non-cancer death<br>(2) CardioV death<br>(3) Out-of-hospital CardioV death<br>(4) Infection (including pneumonia) | 24,359 vs 12,882                   | 80.3 vs 79.88            | 64.8 vs 60.3 | 180 (days) | For typical antipsychotics:<br><b>(1) 1.27 (1.18–1.37)</b><br><b>(2) 1.23 (1.10–1.36)</b><br><b>(3) 1.36 (1.19–1.56)</b><br>(4) 1.21 (0.95-1.53)<br><b>(5) 1.71 (1.35–2.17)</b>                                                                                               |                                                                                                                                                                   |

|                                                                                                                           |                                                                                                                                                                                                |                                                                                                                                 |                                          |                                                                       |                                           |            |                                                                                                                                                             |                                                                                                |
|---------------------------------------------------------------------------------------------------------------------------|------------------------------------------------------------------------------------------------------------------------------------------------------------------------------------------------|---------------------------------------------------------------------------------------------------------------------------------|------------------------------------------|-----------------------------------------------------------------------|-------------------------------------------|------------|-------------------------------------------------------------------------------------------------------------------------------------------------------------|------------------------------------------------------------------------------------------------|
|                                                                                                                           | Exposure: new users of atypical antipsychotics agents vs users of conventional agents                                                                                                          | (5) Respiratory disorders (excluding pneumonia)<br>(6) Nervous system disorders<br>(7) Mental disorders<br>(8) Others disorders |                                          |                                                                       |                                           |            | (6) <b>1.42 (1.01–1.86)</b><br>(7) 1.02 (0.74-1.39)<br>(8) <b>1.27 (1.07–1.51)</b>                                                                          |                                                                                                |
| Vasilyeva et al <sup>52</sup><br>(Canada, Manitoba Population Health Research Data Repository)<br>(NOS 7/9)               | Retrospective cohort study<br>Population: residents in Manitoba aged ≥ 65 years treated with antipsychotics for the first time<br>Exposure: users of first or second generation antipsychotics | (1) CerebroV events<br>(2) MI<br>(3) Cardiac arrhythmia<br>(4) Congestive HF<br>(5) Mortality                                   | 4,655 vs 7,779                           | 77.90 ± 7.98 vs 82.62 ± 7.80                                          | 57.22 vs 62.50                            | 1          | For atypical antipsychotics:<br>(1) 1.14 (0.96-1.34)<br>(2) <b>1.61 (1.02-2.54)</b><br>(3) 0.86 (0.34-2.23)<br>(4) 1.13 (0.90-1.41)<br>(5) 0.68 (0.58-0.81) | Events:<br>(1) 197 vs 809<br>(2) 26 vs 125<br>(3) 7 vs 21<br>(4) 118 vs 406<br>(5) 205 vs. 646 |
| <b>In dementia patients (no 8)</b>                                                                                        |                                                                                                                                                                                                |                                                                                                                                 |                                          |                                                                       |                                           |            |                                                                                                                                                             |                                                                                                |
| Chan et al <sup>14</sup><br>(Japan, ad hoc data)<br>(NOS 6/9)                                                             | Retrospective cohort study<br>Population: patients with vascular and mixed dementia or Alzheimer disease aged ≥ 65 years<br>Exposure: users of typical and atypical antipsychotic vs nonusers  | CerebroV events                                                                                                                 | 72 atypical, 654 typical vs 363 non-user | Atypical 79.93 ± 6.05, typical 81.48 ± 6.71 vs. non-user 80.47 ± 7.05 | Atypical 69.4, typical 66.2, nonuser 63.9 | NA         | For atypical antipsychotics: 1.04 (0.35–3.07);<br>For typical antipsychotics: 0.96 (0.58–1.59)                                                              | Events rate per 1000 person years: atypical 49.6; typical 32.7; nonuser 44.6                   |
| Liperoti et al <sup>33</sup><br>(USA, Systematic Assessment of Geriatric drug use via Epidemiology database)<br>(NOS 6/9) | Retrospective cohort study<br>Population: nursing homes residents with dementia, aged ≥ 65 years, who                                                                                          | All cause-mortality                                                                                                             | 6,524 vs 3,205                           | 83.5 vs 84.5                                                          | 71.8 vs 72                                | 6 (months) | For typical antipsychotics: <b>1.26 (1.13–1.42)</b>                                                                                                         | Death rate: 44.6 per 100 person-years                                                          |

|                                                                                                                                  |                                                                                                                                                                                                                               |                                                                                                                                                           |                                                      |                                                                                                                              |               |    |                                                                                                                                                                                                                                                                                                                                                                   |                                                                                                                                                  |
|----------------------------------------------------------------------------------------------------------------------------------|-------------------------------------------------------------------------------------------------------------------------------------------------------------------------------------------------------------------------------|-----------------------------------------------------------------------------------------------------------------------------------------------------------|------------------------------------------------------|------------------------------------------------------------------------------------------------------------------------------|---------------|----|-------------------------------------------------------------------------------------------------------------------------------------------------------------------------------------------------------------------------------------------------------------------------------------------------------------------------------------------------------------------|--------------------------------------------------------------------------------------------------------------------------------------------------|
|                                                                                                                                  | were new users of antipsychotics<br>Exposure: users of conventional antipsychotics vs users of atypical ones                                                                                                                  |                                                                                                                                                           |                                                      |                                                                                                                              |               |    |                                                                                                                                                                                                                                                                                                                                                                   |                                                                                                                                                  |
| Pariente et al <sup>39</sup><br>(Canada, Public prescription drug and medical services coverage programs databases)<br>(NOS 7/9) | Retrospective cohort study<br>Population: community-dwelling elderly (≥ 65 years) patients with dementia, who were new users of cholinesterase inhibitors<br>Exposure: incident antipsychotic users vs antipsychotic nonusers | MI after<br>(1) 30 days<br>(2) 60 days<br>(3) 90 days and<br>(4) 365 days of treatment                                                                    | 10,969 vs 10,969<br>(17,532 patients aged ≥75 years) | Aged between 66-74: 2,443 vs 1,963; between 75-79: 3,029 vs 2,832; between 80-84: 2,991 vs 3,217; ≥ 85 years: 2,506 vs 2,957 | 66.0 vs. 65.7 | 1  | <b>(1)2.19 (1.11–4.32)</b><br>(2)1.62 (0.99-2.65)<br>(3)1.36 (0.89-2.08)<br>(4)1.15 (0.89-1.47)                                                                                                                                                                                                                                                                   | Number of MI cases:138 vs 126                                                                                                                    |
| <b>Aspirin + clopidogrel + enoxaparin in NSTEMI-ACS patients (no 9)</b>                                                          |                                                                                                                                                                                                                               |                                                                                                                                                           |                                                      |                                                                                                                              |               |    |                                                                                                                                                                                                                                                                                                                                                                   |                                                                                                                                                  |
| Heer et al <sup>24</sup><br>(Germany, Acute Coronary Syndromes Registry)<br>(NOS 5/9)                                            | Observational retrospective multicenter study<br>Population: patients with NSTEMI-ACS<br>Exposure: users of aspirin + clopidogrel + enoxaparin vs users of aspirin + UFH                                                      | (1) Hospital mortality<br>(2) Non-fatal reinfarction<br>(3) Congestive HF<br>(4) Stroke<br>(5) CABG<br>(6) MACE<br>(7) All bleeding<br>(8) Major bleeding | 2,956<br>(128 vs 760 patients aged ≥75 years)        | Median: 67.4 (range 59.8-75.6) vs 69.1 (range 60.6-76.7)                                                                     | 33.8 vs 36.8  | NA | Overall:<br><b>(1) 0.35 (0.18-0.69)</b><br><b>(2) 0.16 (0.06-0.44)</b><br><b>(3) 0.58 (0.35-0.97)</b><br>(4) 0.53 (0.12-2.29)<br>(5) 0.67 (0.45-1.01)<br><b>(6) 0.25 (0.14-0.44)</b><br><b>(7) 2.61 (1.30-5.23)</b><br>(8) 1.72 (0.54-5.44)<br><br>Among subjects aged ≥75 years:<br><b>(6) 0.44 (0.20 – 0.96)</b><br>(7) 1.4 (0.46-4.3)<br>(8) 1.68 (0.28-10.24) | Number of events:<br>(1)9 vs 130<br>(2) 4 vs 121<br>(3) 17 vs 144<br>(4) 2 vs 19<br>(5) 28 vs 212<br>(6) 13 vs 251<br>(7) 17 vs 16<br>(8) 5 vs 7 |
| <b>Atorvastatin + ezetimibe + OAC in AF patients no 10)</b>                                                                      |                                                                                                                                                                                                                               |                                                                                                                                                           |                                                      |                                                                                                                              |               |    |                                                                                                                                                                                                                                                                                                                                                                   |                                                                                                                                                  |



|                                                                                             |                                                                                                                                                                                                                                                                                                               |                                                                                                                                          |                  |                                                                                                     |            |     |                                                                                                           |                                                                                                                                            |
|---------------------------------------------------------------------------------------------|---------------------------------------------------------------------------------------------------------------------------------------------------------------------------------------------------------------------------------------------------------------------------------------------------------------|------------------------------------------------------------------------------------------------------------------------------------------|------------------|-----------------------------------------------------------------------------------------------------|------------|-----|-----------------------------------------------------------------------------------------------------------|--------------------------------------------------------------------------------------------------------------------------------------------|
| Enajat et al <sup>16</sup><br>(The Netherlands, ad hoc data)<br>(Jadad 4/5)                 | Randomized double-blind clinical trial<br>Population: patients aged between 69 and 85 years with chronic or paroxysmal AF with blood cholesterol levels between 4.5 and 7.0 mmol/L<br>Exposure: users of OAC + atorvastatin 40 mg/day + ezetimibe 10 mg/day vs users of OAC + Placebo (target INR of 2.5-3.5) | Major and minor bleeding; intracerebral bleeding; change in median total cholesterol level and low-density lipoprotein cholesterol level | 14 vs 17         | In acenocumarol group: 74.8 ± 4.1 vs 73.5 ± 4.3<br>In phenprocoumon group: 72.7 ± 2.5 vs 75.0 ± 2.0 | 7% vs. 18% | 1   | In the treatment group: 1 Minor bleeding in the treatment group; 3 Increasing in liver enzymes; 1 Myalgia | Compared with 6-months pre-intervention period, the mean daily dose ± standard error was 4.4 ± 1.5% lower in the treatment group (p=0.003) |
| <b>Benzodiazepines + benzodiazepines-related drugs (no 11)</b>                              |                                                                                                                                                                                                                                                                                                               |                                                                                                                                          |                  |                                                                                                     |            |     |                                                                                                           |                                                                                                                                            |
| Gisev et al <sup>20</sup><br>(Finland, Finnish National Prescription Register)<br>(NOS 8/9) | Population-based retrospective cohort study<br>Population: community-dwelling people aged ≥ 65 years<br>Exposure: users of benzodiazepine + benzodiazepine-related drugs (zopiclone and zolpidem) vs nonusers                                                                                                 | Mortality                                                                                                                                | 325 vs 1,520     |                                                                                                     |            |     | No association                                                                                            |                                                                                                                                            |
| <b>Bisphosphonates</b>                                                                      |                                                                                                                                                                                                                                                                                                               |                                                                                                                                          |                  |                                                                                                     |            |     |                                                                                                           |                                                                                                                                            |
| <b>in fracture patients (no 12)</b>                                                         |                                                                                                                                                                                                                                                                                                               |                                                                                                                                          |                  |                                                                                                     |            |     |                                                                                                           |                                                                                                                                            |
| Abrahamsen et al <sup>10</sup><br>(Denmark,                                                 | Register-based restricted cohort study                                                                                                                                                                                                                                                                        | (1) Probable AF<br>(2) Hospital-treated AF<br>(3) Ischemic stroke<br>(4) MI                                                              | 14,302 vs 28,731 | 74.3 ± 8.8                                                                                          | 89.1%      | 2.7 | Overall:<br>(1) <b>1.18 (1.08-1.29)</b><br>(2) <b>1.13 (1.01-1.26)</b><br>(3) 1.06 (0.74-1.52)            | Overall rates per 1000 person years: 20.6 vs 16.5<br>13.7 vs 11.2                                                                          |

|                                                                                                            |                                                                                                                                                                                                       |                                                                           |                                               |                                                                                                                                                                     |               |            |                                                                                                                                                                          |                                                                              |
|------------------------------------------------------------------------------------------------------------|-------------------------------------------------------------------------------------------------------------------------------------------------------------------------------------------------------|---------------------------------------------------------------------------|-----------------------------------------------|---------------------------------------------------------------------------------------------------------------------------------------------------------------------|---------------|------------|--------------------------------------------------------------------------------------------------------------------------------------------------------------------------|------------------------------------------------------------------------------|
| National Hospital Discharge Register and National Prescription Database) (NOS 9/9)                         | Population: fractures patients<br>Exposure: new users of bisphosphonates vs nonusers                                                                                                                  |                                                                           |                                               |                                                                                                                                                                     |               |            | (4) 1.06 (0.92-1.22)<br><br>Among subjects aged >75 years:<br><b>(1) 1.20 (1.07–1.34)</b><br><b>(2) 1.17 (1.02–1.34)</b><br>(3) 1.16 (0.70–1.92)<br>(4) 1.00 (0.84–1.20) | 1.3 vs 1.1<br>8.3 vs 7.1                                                     |
| <b>in women with CKD (no 13)</b>                                                                           |                                                                                                                                                                                                       |                                                                           |                                               |                                                                                                                                                                     |               |            |                                                                                                                                                                          |                                                                              |
| Hartle et al <sup>23</sup> (USA, EpicCare, Geisinger Medical Center’s electronic health records) (NOS 8/9) | Retrospective cohort study<br>Population: women aged 18-88 years who were enrolled for primary care at any Geisinger facility and with baseline CKD<br>Exposure: users of bisphosphonates vs nonusers | (1) Death<br>(2) Composite major CardioV events                           | 3,234 vs 6,370 (5100 patients aged ≥73 years) | 74.2 ± 8.0 vs 71.2 ± 10.7                                                                                                                                           | 100%          | 3.9        | Overall:<br><b>(1) 0.78 (0.67-0.91)</b><br>(2) 1.14 (0.94-1.39)<br><br>For subjects aged ≥73 years:<br><b>(1) 0.78 (0.66 – 0.93)</b><br>(2) 1.04 (0.84-1.30)             | Overall rates per 1000 person years:<br>(1) 26.8 vs 30.3<br>(2) 20.0 vs 20.4 |
| <b>CCBs + CYP3A4 inhibitors in hypertensive patients (no 14)</b>                                           |                                                                                                                                                                                                       |                                                                           |                                               |                                                                                                                                                                     |               |            |                                                                                                                                                                          |                                                                              |
| Yoshida et al <sup>56</sup> (Japan, Administrative database) (NOS 6/9)                                     | Nested case-control study<br>Population: hypertensive patients treated with CCBs<br>Exposure: users of CCB + CYP3A4 inhibitor or CCB + other drugs (non CYP3A4 inhibitor) vs users of CCBs alone      | ADRs                                                                      | 17,430 (Patients >70 years old 30 vs 160)     | Aged <30 years: 18 vs 63; between 31 and 40: 99 vs 297; between 41 and 50: 175 vs 593; between 51 and 60: 198 vs 823; between 61 and 70: 120 vs 624; >70: 30 vs 160 | 63.6 vs. 52.2 | 12 (weeks) | For patients aged >70 years: 0.52 (0.20–1.34)                                                                                                                            |                                                                              |
| <b>CCBs in hypertensive patients (no 15)</b>                                                               |                                                                                                                                                                                                       |                                                                           |                                               |                                                                                                                                                                     |               |            |                                                                                                                                                                          |                                                                              |
| Jung et al <sup>27</sup> (Korea, Health Insurance Review                                                   | Observational case-crossover study                                                                                                                                                                    | (1) Stroke (total risk)<br>(2) Ischemic stroke<br>(3) Haemorrhagic stroke | 373/16,069 (5,546 patients aged 70-74 years)  | 68.3 ± 2.1                                                                                                                                                          | 53.3          | 1 year     | <b>(1) 2.56 (1.96–3.37)</b><br><b>(2) 2.56 (1.89–3.47)</b><br><b>(3) 5.16 (2.29–11.66)</b><br><b>(4) 3.60 (1.34–9.66)</b>                                                | Number of events (of whom among exposed patients):<br>(1) 16,060 (373)       |

|                                                                                          |                                                                                                                                                                                                 |                                                                                                                                                     |                  |                          |              |   |                                                                                                                          |                                                                                                                                                                                                                        |
|------------------------------------------------------------------------------------------|-------------------------------------------------------------------------------------------------------------------------------------------------------------------------------------------------|-----------------------------------------------------------------------------------------------------------------------------------------------------|------------------|--------------------------|--------------|---|--------------------------------------------------------------------------------------------------------------------------|------------------------------------------------------------------------------------------------------------------------------------------------------------------------------------------------------------------------|
| and Assessment Service database) (Quality Assessment 7/8)                                | Population: elderly patients aged ≥ 65 years with at least one diagnosis of hypertension and at least one prescription of CCBs<br>Exposure: users of nifedipine vs users of other CCBs          | (4) Intracranial haemorrhage<br>(5) Subarachnoid Haemorrhage                                                                                        |                  |                          |              |   | <b>(5) 14.10 (1.84–108.25)</b>                                                                                           | (2) 12,961 (299)<br>(3) 2,686 (67)<br>(4) 1,970 (40)<br>(5) 530 (18)                                                                                                                                                   |
| <b>Cholinesterase inhibitors in dementia patients (no 16)</b>                            |                                                                                                                                                                                                 |                                                                                                                                                     |                  |                          |              |   |                                                                                                                          |                                                                                                                                                                                                                        |
| Gill et al <sup>19</sup> (Canada, Ontario administrative healthcare databases) (NOS 689) | Population-based cohort study<br>Population: community-dwelling patients aged ≥ 66 years with a prior diagnosis of dementia<br>Exposure: users of cholinesterase inhibitors vs nonusers         | (1) Hospital visits for syncope<br>(2) Hospital visits for bradycardia<br>(3) Permanent pacemaker insertion<br>(4) Hospitalization for hip fracture | 19,803 vs 61,499 | 80.4 ± 6.3 vs 80.4 ± 7.4 | 62.5 vs 61.2 | 2 | <b>(1) 1.76 (1.57–1.98)</b><br><b>(2) 1.69 (1.32–2.15)</b><br><b>(3) 1.49 (1.12–2.00)</b><br><b>(4) 1.18 (1.04–1.34)</b> | Number of events:<br>(1) 428 vs 944<br>(2) 95 vs 224<br>(3) 64 vs 166<br>(4) 306 vs 1,008<br><br>Event rate, events per 1000 person-years:<br>(1) 31.5 vs 18.6<br>(2) 6.9 vs 4.4<br>(3) 4.7 vs 3.3<br>(4) 22.4 vs 19.8 |
| <b>Clopidogrel + PPIs (no 17)</b>                                                        |                                                                                                                                                                                                 |                                                                                                                                                     |                  |                          |              |   |                                                                                                                          |                                                                                                                                                                                                                        |
| Juurink et al <sup>28</sup> (Canada, Ontario Public Drug Program) (NOS 7/9)              | Nested case-control study<br>Population: subjects ≥ 66 years with a prescription of clopidogrel within 3 days after hospital discharge following treatment for acute MI<br>Exposure: users PPIs | (1) Recurrent MI < 90 days<br>(2) Death < 90 days<br>(3) Recurrent MI < 1 year<br>(4) Death < 1 year                                                | 734 vs 2,057     | Median: 77 (range 72-83) | 47.7 vs 44.9 | 5 | <b>(1) 1.27 (1.03–1.57)</b><br>(2) 0.82 (0.57-1.18)<br><b>(3) 1.23 (1.01–1.49)</b><br>(4) 0.89 (0.67-1.18)               | Number of current users among cases:<br>(1) 194/734<br>(2) 71/323<br>(3) 240/982<br>(4) 116/531<br>among controls:<br>(1) 424/2,057<br>(2) 188/916<br>(3) 497/2,626<br>(4) 269/1,407                                   |

|                                                                                                                                                                                                                                                                    |                                                                                                                                                                                                              |                                                                                                                                                                             |                                                                                  |                                                                                                                                        |                                                                                  |            |                                                                                                                                                                                    |                                                                                                                                                                                                                                                                                                                                                                                                                                                    |
|--------------------------------------------------------------------------------------------------------------------------------------------------------------------------------------------------------------------------------------------------------------------|--------------------------------------------------------------------------------------------------------------------------------------------------------------------------------------------------------------|-----------------------------------------------------------------------------------------------------------------------------------------------------------------------------|----------------------------------------------------------------------------------|----------------------------------------------------------------------------------------------------------------------------------------|----------------------------------------------------------------------------------|------------|------------------------------------------------------------------------------------------------------------------------------------------------------------------------------------|----------------------------------------------------------------------------------------------------------------------------------------------------------------------------------------------------------------------------------------------------------------------------------------------------------------------------------------------------------------------------------------------------------------------------------------------------|
| Mahabaleshwarkar et al <sup>36</sup><br>(USA, Medicare)<br>(NOS 6/9)                                                                                                                                                                                               | Nested case-control study<br>Population: subjects $\geq$ 65 years who had initiated clopidogrel therapy and with no gap of 30 days or more between clopidogrel prescription fills<br>Exposure: users of PPIs | (1) Major CardioV events or all-cause mortality (composite)<br>(2) Acute MI<br>(3) Stroke<br>(4) CABG<br>(5) PCI<br>(6) All-cause mortality<br>(7) Any major CardioV events | 9,908 vs 9,908                                                                   | 79.0 $\pm$ 7.7 vs 78.9 $\pm$ 7.5                                                                                                       | 60.5 vs 66.2                                                                     | 2          | (1) <b>1.26 (1.18–1.34)</b><br>(2) 0.85 (0.59-1.23)<br>(3) 1.05 (0.86-1.28)<br>(4) 0.82 (0.54-1.26)<br>(5) 1.11 (0.94-1.31)<br>(6) <b>1.40 (1.29–1.53)</b><br>(7) 1.06 (0.95-1.18) |                                                                                                                                                                                                                                                                                                                                                                                                                                                    |
| Rassen et al <sup>43</sup><br>(USA, Provincial health care system funded by the British Columbia government, Pharmaceutical Assistance Contract for the Elderly in Pennsylvania and Pharmaceutical Assistance to the Aged and Disabled in New Jersey)<br>(NOS 7/9) | Cohort study<br>Population: subjects that underwent PCI or hospitalized for ACS and were new users of clopidogrel<br>Exposure: concurrent users of PPIs vs nonusers                                          | (1) MI hospitalization or death;<br>(2) MI hospitalization;<br>(3) All-cause death; (4) Revascularization                                                                   | Cohort 1: 1,353 vs 9,038<br>Cohort 2: 1,352 vs 2,824<br>Cohort 3: 1,291 vs 2,707 | Cohort 1: 75.7 $\pm$ 6.7 vs 74.3 $\pm$ 6.4<br>Cohort 2: 78.7 $\pm$ 6.6 vs 78.3 $\pm$ 6.7<br>Cohort 3: 78.4 $\pm$ 6.9 vs 77.7 $\pm$ 6.9 | Cohort 1: 46.1 vs. 36%<br>Cohort 2: 78.4% vs. 73.3%<br>Cohort 3: 69.1% vs. 63.6% | 3 (months) | (1)1.22 (0.99–1.51)<br>(2) 1.22 (0.95–1.57)<br>(3) 1.20 (0.84–1.70)<br>(4) 0.97 (0.79–1.21)                                                                                        | Number of events<br>(1) cohort 1: 73 vs 272<br>cohort 2: 46 vs 63<br>cohort 3: 37 vs 71<br>(2) cohort 1: 62 vs 240<br>cohort 2: 22 vs 29<br>cohort 3: 18 vs 33<br>(3) cohort 1: 15 vs 45<br>cohort 2: 25 vs 38<br>cohort 3: 21 vs 41<br>(4) Cohort 1: 43 vs 179<br>cohort 2: 41 vs 112<br>cohort 3: 52 vs 158<br><br>Incidence rate per 100 person-year:<br>(1) 47.9-48.3-33.2;<br>(2) 40.6-23.1-16.2;<br>(3) 9.5-25.8-18.8;<br>(4) 27.9-43.1-48.2 |
| Rossini et al <sup>44</sup><br>(Italy, Administrative database)<br>(NOS 7/9)                                                                                                                                                                                       | Observational study<br>Population: patients that underwent PCI                                                                                                                                               | MACE; bleeding; death; any stent thrombosis                                                                                                                                 | 1,158 vs 170                                                                     | 64 $\pm$ 11 vs 63 $\pm$ 11                                                                                                             | 24.4 vs 18.8                                                                     | 1          | For patients aged >75 years: 1.61 (0.35–7.37)                                                                                                                                      |                                                                                                                                                                                                                                                                                                                                                                                                                                                    |

|                                                                                                       |                                                                                                                                                                                        |                                                                                                                                       |                                                    |                              |          |                                  |                                                                                                                                                                                                                                                            |                                                                                                                                 |
|-------------------------------------------------------------------------------------------------------|----------------------------------------------------------------------------------------------------------------------------------------------------------------------------------------|---------------------------------------------------------------------------------------------------------------------------------------|----------------------------------------------------|------------------------------|----------|----------------------------------|------------------------------------------------------------------------------------------------------------------------------------------------------------------------------------------------------------------------------------------------------------|---------------------------------------------------------------------------------------------------------------------------------|
|                                                                                                       | and drug-eluting stents<br>implantation<br>treated with aspirin and clopidogrel<br>Exposure:<br>concurrent users of PPIs vs nonusers                                                   |                                                                                                                                       |                                                    |                              |          |                                  |                                                                                                                                                                                                                                                            |                                                                                                                                 |
| <b>Donepezil + clarithromycin (no 18)</b>                                                             |                                                                                                                                                                                        |                                                                                                                                       |                                                    |                              |          |                                  |                                                                                                                                                                                                                                                            |                                                                                                                                 |
| Hutson et al <sup>26</sup><br>(Canada, Ontario Provincial healthcare database)<br>(NOS 6/9)           | Nested case-control study<br>Population: residents aged ≥66 years and users of antibacterial agents for respiratory tract infections<br>Exposure: recent users of antibacterial agents | Hospitalization for CardioV events                                                                                                    | 59 vs 295                                          | 81.69 ± 6.14 vs 82.39 ± 5.98 | 49.2     | 8                                | For clarithromycin: 0.67 (0.28-1.63);<br>for cefurozime: 2.07 (0.76-5.68);<br>for levofloxacin or moxifloxacin: 1.01 (0.48-2.16)                                                                                                                           |                                                                                                                                 |
| <b>LABA and LAA in COPD patients (no 19)</b>                                                          |                                                                                                                                                                                        |                                                                                                                                       |                                                    |                              |          |                                  |                                                                                                                                                                                                                                                            |                                                                                                                                 |
| Gershon et al <sup>18</sup><br>(Canada, Ontario health care database)<br>(NOS 6/9)                    | Nested case-control study<br>Population: individuals aged ≥ 66 with COPD<br>Exposure: new users of inhaled LABAs or LAAs                                                               | (1) Hospitalization or emergency department visit for acute coronary syndrome<br>(2) HF<br>(3) Cardiac arrhythmia (4) Ischemic stroke | 26,628 vs 26,628                                   | 79.0 ± 7.1 vs 78.9 ± 7.1     | 48.1     | 5                                | For LAAs:<br><b>(1) 1.30 (1.04–1.62)</b><br><b>(2) 1.31 (1.08–1.60)</b><br>(3) 1.26 (0.91-1.75)<br><b>(4) 0.68 (0.50–0.91)</b><br>For LABAs:<br><b>(1) 1.43 (1.08–1.89)</b><br><b>(2) 1.42 (1.10–1.83)</b><br>(3) 1.17 (0.74-1.83)<br>(4) 1.17 (0.78-1.74) | For LABAs vs LAAs:<br>(1)1.10 (0.78- 1.56)<br>(2) 1.08 (0.79 - 1.47)<br>(3) 0.93 (0.54 – 1.59)<br><b>(4) 1.73 (1.06 – 2.83)</b> |
| <b>New ACE inhibitors in AF patients (no 20)</b>                                                      |                                                                                                                                                                                        |                                                                                                                                       |                                                    |                              |          |                                  |                                                                                                                                                                                                                                                            |                                                                                                                                 |
| Mujib et al <sup>38</sup><br>(USA, Organized Program to Initiate Lifesaving Treatment in Hospitalized | Cohort study<br>Population: patients aged ≥ 65 years with HF and preserved ejection fraction ≥40%                                                                                      | (1) Composite outcome (all-cause mortality or HF hospitalization)<br>(2) all-cause mortality<br>(3) HF hospitalization                | After propensity score matching:<br>1,337 vs 1,337 | 81 ± 8                       | 64 vs 63 | 6; Median 2.4 (range: 0.7 – 4.5) | <b>(1) 0.91 (0.84 – 0.99)</b><br>(2) 0.96 (0.88-1.05)<br>(3) 0.93 (0.83-1.05)<br>(4) 0.97 (0.89-1.05)                                                                                                                                                      | Number of events:<br>(1) 1,076 vs 1,112<br>(2) 930 vs 951<br>(3) 558 vs 564<br>(4) 1,165 vs 1,155                               |

|                                                                                            |                                                                                                                                                                                                             |                                                                                       |                                                                                                                                  |                                                                                                                                                                         |                                                                                                                                           |                                                                                                                                    |                                                                                                                                                                                                                                                             |                                                                                                                                                                                                    |
|--------------------------------------------------------------------------------------------|-------------------------------------------------------------------------------------------------------------------------------------------------------------------------------------------------------------|---------------------------------------------------------------------------------------|----------------------------------------------------------------------------------------------------------------------------------|-------------------------------------------------------------------------------------------------------------------------------------------------------------------------|-------------------------------------------------------------------------------------------------------------------------------------------|------------------------------------------------------------------------------------------------------------------------------------|-------------------------------------------------------------------------------------------------------------------------------------------------------------------------------------------------------------------------------------------------------------|----------------------------------------------------------------------------------------------------------------------------------------------------------------------------------------------------|
| Patients With Heart Failure) (NOS 7/9)                                                     | Exposure: users of ACE inhibitors vs nonusers                                                                                                                                                               | (4) all-cause hospitalization                                                         |                                                                                                                                  |                                                                                                                                                                         |                                                                                                                                           |                                                                                                                                    |                                                                                                                                                                                                                                                             |                                                                                                                                                                                                    |
| <b>NSAIDs (no 21)</b>                                                                      |                                                                                                                                                                                                             |                                                                                       |                                                                                                                                  |                                                                                                                                                                         |                                                                                                                                           |                                                                                                                                    |                                                                                                                                                                                                                                                             |                                                                                                                                                                                                    |
| Abraham et al <sup>9</sup> (USA, Veterans Affairs -Pharmacy Benefits Management) (NOS 8/9) | Retrospective cohort study<br>Population: veterans > 65years prescribed an NSAID at any Veterans Affairs facility<br>Exposure: users of NSAIDs, NSAIDs + PPIs, coxib, coxib + PPIs, PPIs vs NSAIDs nonusers | All-cause mortality following<br>(1) Upper GI events<br>(2) MI<br>(3) CerebroV events | 474,495                                                                                                                          | 73.0 ± 5.5                                                                                                                                                              | 2.1                                                                                                                                       | 3                                                                                                                                  | <b>(1) 3.3 (2.8–3.4)</b><br><b>(2) 10.3 (9.2–11.6)</b><br><b>(3) 12.4 (10.9–14.3)</b>                                                                                                                                                                       | Rate of events pre 1000 person-years:<br>(1) 5.5 (CI 5.4-5.6);<br>(2) 17.7 (CI 17.5-17.9);<br>(3) 21.8 (CI 21.6-22.0)                                                                              |
| Caughey et al <sup>13</sup> (Australia, Administrative database) (NOS 7/9)                 | Retrospective cohort study<br>Population: Australian veterans with incident dispensing of an NSAIDs<br>Exposure: users of NSAIDs                                                                            | (1) All stroke<br>(2) Ischaemic stroke<br>(3) Haemorrhagic stroke                     | 162,065                                                                                                                          | 76.0 ± 7.9                                                                                                                                                              | 40                                                                                                                                        | 1                                                                                                                                  | <b>(1) 1.88 (1.70–2.08)</b><br><b>(2) 1.90 (1.65–2.18)</b><br><b>(3) 2.19 (1.74–2.77)</b>                                                                                                                                                                   | Absolute risk of stroke for 1000 person-years: 7.1                                                                                                                                                 |
| Roumie et al <sup>45</sup> (USA, Tennessee Medicaid program) (NOS 7/9)                     | Retrospective Observational Study<br>Population: non-institutionalized person aged 35-94 years who did not have evidence of any non-cardiovascular serious medical illness prior to cohort entry            | Hospitalization for acute MI, stroke, or death from coronary heart disease            | NSAIDs users with history of CardioV disease:<br>– Colecoxib 1,882<br>– Rofecoxib 1,354<br>– Valdecoxib 394<br>– Ibuprofen 6,236 | NSAIDs users with history of CardioV:<br>-Colecoxib 56.8 ± 14.6<br>-Rofecoxib 53.6 ± 14.2<br>-Valdecoxib 55.7 ± 15.3<br>-Ibuprofen 51.4 ± 13.5<br>-Naproxen 51.5 ± 13.2 | NSAIDs users with history of CardioV:<br>-Colecoxib 62.75<br>-Rofecoxib 56.06<br>-Valdecoxib 63.45<br>-Ibuprofen 58.88<br>-Naproxen 58.23 | Patients with past history of CardioV: 397,977 person-years;<br>Patients without past history of CardioV: 1,566,678 (person-years) | In patients aged ≥ 65 years and among subjects with CardioV history,<br>for colecoxib: 0.98 (0.85 – 1.14)<br>for rofecoxib: 1.14 (0.96- 1.34)<br>for valdecoxib: 1.10 (0.84 – 1.45)<br>for ibuprofen: 1.06 (0.88 – 1.27)<br>for naproxen:0.89 (0.75 – 1.06) | Number of cardiovascular events/person-years:<br>NSAIDs users with history of CardioV:<br>-Colecoxib 199/7,665<br>-Rofecoxib 210/6,293<br>-Valdecoxib 53/2,423<br>-Ibuprofen 79/3,741<br>-Naproxen |

|  |                                                            |  |                                                                                                                                                                                                                                                                                                                                                                                                                                                                                                |                                                                                                                                                                                                                                                                                                                                                                                                                                                                                           |                                                                                                                                                                                                                                                                                                                                                                                                                  |  |                                                                                                                                                                                                                                                                                                                                                                                                                                           |                                                                                                                                                                                                                                                                                                                                                                                                                                                                                     |
|--|------------------------------------------------------------|--|------------------------------------------------------------------------------------------------------------------------------------------------------------------------------------------------------------------------------------------------------------------------------------------------------------------------------------------------------------------------------------------------------------------------------------------------------------------------------------------------|-------------------------------------------------------------------------------------------------------------------------------------------------------------------------------------------------------------------------------------------------------------------------------------------------------------------------------------------------------------------------------------------------------------------------------------------------------------------------------------------|------------------------------------------------------------------------------------------------------------------------------------------------------------------------------------------------------------------------------------------------------------------------------------------------------------------------------------------------------------------------------------------------------------------|--|-------------------------------------------------------------------------------------------------------------------------------------------------------------------------------------------------------------------------------------------------------------------------------------------------------------------------------------------------------------------------------------------------------------------------------------------|-------------------------------------------------------------------------------------------------------------------------------------------------------------------------------------------------------------------------------------------------------------------------------------------------------------------------------------------------------------------------------------------------------------------------------------------------------------------------------------|
|  | Exposure: users of NSAIDs vs nonusers, with CardioV or not |  | <p>- Naproxen<br/>7,249</p> <p>- Indomethacin<br/>1,361</p> <p>- Diclofenac<br/>496</p> <p>NSAIDs non-users with history of CardioV disease:<br/>60,784</p> <p>NSAIDs users without history of CardioV disease:<br/>- Colecoxib<br/>7,117<br/>- Rofecoxib<br/>6,840<br/>- Valdecoxib<br/>1,742<br/>- Ibuprofen<br/>44,261<br/>- Naproxen<br/>48,103<br/>-</p> <p>Indomethacin<br/>6,730<br/>- Diclofenac<br/>3,420</p> <p>NSAIDs non-users without history of CardioV disease:<br/>380,434</p> | <p>- Indomethacin<br/>52.2 ± 12.9</p> <p>-Diclofenac<br/>51.6 ± 13.4</p> <p>-NSAIDs non-users with history of CVD:<br/>55.1 ± 14.4</p> <p>NSAIDs users without history of CardioV:<br/>-Colecoxib<br/>49.4 ± 14<br/>-Rofecoxib<br/>45.4 ± 12.6<br/>-Valdecoxib<br/>47.8 ± 14.3<br/>-Ibuprofen<br/>42.6 ± 11.3<br/>-Naproxen<br/>43.4 ± 11.4<br/>-</p> <p>Indomethacin<br/>45.2 ± 12.3<br/>-Diclofenac<br/>43.3 ± 11.2</p> <p>NSAIDs non-users without history of CVD:<br/>44.6 ± 12.7</p> | <p>- Indomethacin<br/>46.88</p> <p>-Diclofenac<br/>58.27</p> <p>NSAIDs non-users with history of CVD:<br/>51.34</p> <p>NSAIDs users without history of CardioV:<br/>-Colecoxib<br/>68.6<br/>-Rofecoxib<br/>64.8<br/>-Valdecoxib<br/>69.9<br/>-Ibuprofen<br/>69.7<br/>-Naproxen<br/>68.2<br/>-</p> <p>Indomethacin<br/>54.7<br/>-Diclofenac<br/>66.0</p> <p>NSAIDs non-users without history of CVD:<br/>61.5</p> |  | <p>for diclofenac: 1.09 (0.69 – 1.71)<br/>for indomethacin: 0.92 (0.61 – 1.37)</p> <p>In patients aged ≥ 65 years and among subjects without CardioV history,<br/>for colecoxib: 1.15 (0.98 – 1.33)<br/>for rofecoxib: 1.26 (1.05–1.51)<br/>for valdecoxib: 1.40 (1.05–1.87)<br/>for ibuprofen: 0.98 (0.83 – 1.17)<br/>for naproxen: 0.92 (0.72 – 1.08)<br/>for diclofenac: 1.20 (0.79 – 1.83)<br/>for indomethacin: 1.57 (1.15–2.14)</p> | <p>130/5,798<br/>-Indomethacin<br/>24/953<br/>-Diclofenac<br/>30/1,499</p> <p>NSAIDs non-users with history of CardioV:<br/>5,885/207,965</p> <p>NSAIDs users without history of CardioV:<br/>-Colecoxib<br/>189/18,081<br/>-Rofecoxib<br/>186/16,537<br/>-Valdecoxib<br/>68/4,770<br/>-Ibuprofen<br/>116/16,327<br/>-Naproxen<br/>162/22,739<br/>-Indomethacin<br/>35/2,987<br/>-Diclofenac<br/>26/4,728</p> <p>NSAIDs non-users without history of CardioV:<br/>6,796/860,356</p> |
|--|------------------------------------------------------------|--|------------------------------------------------------------------------------------------------------------------------------------------------------------------------------------------------------------------------------------------------------------------------------------------------------------------------------------------------------------------------------------------------------------------------------------------------------------------------------------------------|-------------------------------------------------------------------------------------------------------------------------------------------------------------------------------------------------------------------------------------------------------------------------------------------------------------------------------------------------------------------------------------------------------------------------------------------------------------------------------------------|------------------------------------------------------------------------------------------------------------------------------------------------------------------------------------------------------------------------------------------------------------------------------------------------------------------------------------------------------------------------------------------------------------------|--|-------------------------------------------------------------------------------------------------------------------------------------------------------------------------------------------------------------------------------------------------------------------------------------------------------------------------------------------------------------------------------------------------------------------------------------------|-------------------------------------------------------------------------------------------------------------------------------------------------------------------------------------------------------------------------------------------------------------------------------------------------------------------------------------------------------------------------------------------------------------------------------------------------------------------------------------|

| <b>OACs (no 22)</b>                                                                                                      |                                                                                                                                                                                                                                         |                                                                                                            |                                                                                                         |                            |          |                 |                                                                                                                                                                                                                                                                                                      |                                                                                                                                                                     |
|--------------------------------------------------------------------------------------------------------------------------|-----------------------------------------------------------------------------------------------------------------------------------------------------------------------------------------------------------------------------------------|------------------------------------------------------------------------------------------------------------|---------------------------------------------------------------------------------------------------------|----------------------------|----------|-----------------|------------------------------------------------------------------------------------------------------------------------------------------------------------------------------------------------------------------------------------------------------------------------------------------------------|---------------------------------------------------------------------------------------------------------------------------------------------------------------------|
| Poli et al <sup>41</sup><br>(Italy, Elderly Patients followed by Italian Centres for Anticoagulation study)<br>(NOS 5/9) | Multicenter prospective observational study<br>Population: old patients who started vitamin K antagonist treatment after 80 years of age for thromboprophylaxis of AF or venous thromboembolism<br>Exposure: users vitamin K antagonist | Major bleedings                                                                                            | 4,093                                                                                                   | 84 (range 80-102)          | 57       | 2.35 (SD ± 2.1) | NA                                                                                                                                                                                                                                                                                                   | Number of events: 179 major bleedings; rate per 100 patient-years: 1.87; rate per 100 patient-years (<85 years): 1.71; rate per 100 patient-years (≥85 years): 2.22 |
| <b>In CAD patients (no 23)</b>                                                                                           |                                                                                                                                                                                                                                         |                                                                                                            |                                                                                                         |                            |          |                 |                                                                                                                                                                                                                                                                                                      |                                                                                                                                                                     |
| Ruiz Ortiz et al <sup>46</sup><br>(Spain, Administrative database)<br>(NOS 7/9)                                          | Observational study<br>Population: patients aged ≥80 years with non-valvular AF treated<br>Exposure: users of OAC vs nonusers                                                                                                           | (1) Embolic events<br>(2) Severe bleeding<br>(3) All embolic and hemorrhagic events<br>(4) All-cause death | 164 vs 105<br>(196 patients aged 80-84 years; 57 patients aged 85-89 years; 16 patients aged ≥90 years) | 83 ± 3 vs 84 ± 4           | 65 vs 72 | 2.8 (SD ± 1.9)  | <b>(1) 0.17 (0.07 – 0.41)</b><br><b>(2) 2.66 (0.76-9.32)</b><br><b>(3) 0.46 (0.25– 0.83)</b><br><b>(4) 0.52 (0.31 – 0.88)</b>                                                                                                                                                                        | Number of events:<br>7 vs 20<br>14 vs 3<br>21 vs 23<br>32 vs 28                                                                                                     |
| Tanaka et al <sup>49</sup><br>(Japan, Administrative database)<br>(NOS 2/9)                                              | Retrospective case-control study<br>Population: patients treated with antithrombotic drugs<br>Exposure: users of OACs                                                                                                                   | GI injuries, including gastric ulcers, duodenal ulcers, and hemorrhagic injuries                           | 172 vs. 3,099<br>(39 vs 156 patients aged 60-69 years; 102 vs 408 patients aged ≥70 years)              | 70.0 ± 14.0 vs 66.2 ± 18.0 | 43 vs 45 | NA              | Among patients aged 50-59 years,<br>for low-dose aspirin: 1.73 (0.52 – 6.16)<br>for clopidogrel: 2.56 (0.61 – 10.64)<br>for warfarin: 2.10 (0.34 – 11.76)<br>for NSAIDs: 6.42 (2.04 – 22.62)<br><br>Among patients aged 60-69 years,<br>for low-dose aspirin: 1.29 (0.56 – 2.96)<br>for clopidogrel: |                                                                                                                                                                     |



|                                                                                       |                                                                                                                                                                                                                                                     |                                                    |                                                                                               |                                  |                                                                                                    |            |                                                                                                                                                                                                                            |                                                                                                                                                  |
|---------------------------------------------------------------------------------------|-----------------------------------------------------------------------------------------------------------------------------------------------------------------------------------------------------------------------------------------------------|----------------------------------------------------|-----------------------------------------------------------------------------------------------|----------------------------------|----------------------------------------------------------------------------------------------------|------------|----------------------------------------------------------------------------------------------------------------------------------------------------------------------------------------------------------------------------|--------------------------------------------------------------------------------------------------------------------------------------------------|
|                                                                                       |                                                                                                                                                                                                                                                     |                                                    |                                                                                               |                                  |                                                                                                    |            | 4.41 (1.56 – 12.43)<br>for warfarin:<br>1.80 (0.74 – 4.26)<br>for NSAIDs:<br><b>4.01 (1.83 – 8.86)</b>                                                                                                                     |                                                                                                                                                  |
|                                                                                       |                                                                                                                                                                                                                                                     |                                                    |                                                                                               |                                  |                                                                                                    |            | Among patients aged<br>≥70 years,<br>for low-dose aspirin:<br><b>1.91 (1.17–3.16)</b><br>for clopidogrel:<br><b>3.07 (1.62–5.77)</b><br>for warfarin:<br><b>2.45 (1.35–4.43)</b><br>for NSAIDs:<br><b>4.26 (2.65–6.93)</b> |                                                                                                                                                  |
| <b>Olmesartan medoxomil in hypertensive patients (no 24)</b>                          |                                                                                                                                                                                                                                                     |                                                    |                                                                                               |                                  |                                                                                                    |            |                                                                                                                                                                                                                            |                                                                                                                                                  |
| Saito et al <sup>47</sup><br>(Japan, ad hoc<br>database)<br>(NOS 2/9)                 | Prospective cohort<br>study<br>Population:<br>olmesartan-naïve<br>hypertensive<br>patients aged ≥65<br>years<br>Exposure:<br>olmesartan alone,<br>in combination<br>with drugs, or by<br>switching from<br>other<br>antihypertensive<br>medications | Blood pressure; Clinical<br>laboratory tests; ADRs | 550<br>(280 young-<br>old patients<br>65-74 years;<br>270 older-old<br>patients ≥75<br>years) | 74.8 (range<br>65-95)            | Young-old<br>65-74:<br>SDH 58.6%;<br>ISH 72.1%<br><br>Older-old<br>≥75:<br>SDH 74.3%;<br>ISH 72.7% | 6 (months) | No association                                                                                                                                                                                                             | N (%) patients with<br>ADRs:<br>Young-old 65-74:<br>SDH = 8 (5.67);<br>ISH = 4 (2.84)<br><br>Older-old ≥75:<br>SDH = 6 (5.45);<br>ISH = 9 (5.56) |
| <b>Opioids (no 25)</b>                                                                |                                                                                                                                                                                                                                                     |                                                    |                                                                                               |                                  |                                                                                                    |            |                                                                                                                                                                                                                            |                                                                                                                                                  |
| Li et al <sup>32</sup><br>(UK, General<br>Practice Research<br>Database)<br>(NOS 6/9) | Nested case-<br>control study<br>Population: non-<br>cancer pain<br>patients who had a<br>record for at least<br>one opioid<br>prescription<br>Exposure: users of<br>opioids                                                                        | MI                                                 | 11,693 vs<br>44,897                                                                           | 61.8 ± 11.2<br>vs 61.6 ±<br>11.2 | 31.1 vs. 31.3                                                                                      | NA         | Among patients aged<br>71–80 years old,<br>for male:<br><b>1.46 (1.23–1.75)</b><br>for female:<br><b>1.34 (1.12–1.61)</b>                                                                                                  | Among patients aged<br>61-70 years,<br>for male:<br>1.08 (0.92-1.26);<br>for female: 1.20 (0.97-<br>1.47)                                        |

| <b>Postmenopausal hormones (no 26)</b>                                                                          |                                                                                                                                                                                                                                                                                                                                       |                                                                                                                               |                                                                              |            |               |           |                                                                                                                           |                                                                                                                                                        |
|-----------------------------------------------------------------------------------------------------------------|---------------------------------------------------------------------------------------------------------------------------------------------------------------------------------------------------------------------------------------------------------------------------------------------------------------------------------------|-------------------------------------------------------------------------------------------------------------------------------|------------------------------------------------------------------------------|------------|---------------|-----------|---------------------------------------------------------------------------------------------------------------------------|--------------------------------------------------------------------------------------------------------------------------------------------------------|
| Løkkegaard et al <sup>34</sup><br>(Denmark, Danish Sex Hormone Register Study)<br>(NOS 8/9)                     | Retrospective cohort study<br>Population: healthy Danish women aged 51-69 years<br>Exposure: users of hormone therapy vs nonusers                                                                                                                                                                                                     | MI                                                                                                                            | Patients aged 65-69 years:<br>– Previous use 27,338;<br>– Current use 75,473 | NA         | 100           | 7         | For patients aged 65–69 years:<br>–for past use<br><b>0.77 (0.60–0.99)</b><br>–for current use<br>0.92 (0.80-1.06)        | Number of events:<br>–previous use: 64<br>– current use: 211<br>Rate for 1000 women-year:<br>–previous use: 2.34<br>–current use: 2.80                 |
| <b>Statins + clopidogrel in PCI patients (no 27)</b>                                                            |                                                                                                                                                                                                                                                                                                                                       |                                                                                                                               |                                                                              |            |               |           |                                                                                                                           |                                                                                                                                                        |
| Blagojevic et al <sup>11</sup><br>(Canada, Health Insurance databases of Quebec)<br>(NOS 6/9)                   | Population-based cohort study<br>Population: PCI patients aged ≥66 years and receiving their first post discharge clopidogrel prescription within 5 days of the hospital discharge date<br>Exposure: users of clopidogrel + non-CYP3A4-metabolized statins, or clopidogrel + CYP3A4-metabolized statins vs clopidogrel and no statins | Death; MI; unstable angina; hospitalization with repeat revascularization; CerebroV events                                    | 8,417 vs 2,074                                                               | 74.1 ± 5.7 | 40.1          | 90 (days) | HRs compared to non-CYP3A4-metabolized statins:<br>–for CYP3A4 1.16 (0.91–1.47)<br>– for no statin 1.22 (0.93–1.59)       | Number of events:<br>76 for non-CYP3A4-metabolized statins,<br>316 for CYP3A4-metabolized statins,<br>231 for no statin                                |
| <b>Statins + macrolides (no 28)</b>                                                                             |                                                                                                                                                                                                                                                                                                                                       |                                                                                                                               |                                                                              |            |               |           |                                                                                                                           |                                                                                                                                                        |
| Patel et al <sup>40</sup><br>(Canada, Ontario Drug Benefit database, Canadian Institute for health Information) | Population-based cohort study<br>Population: continuous statin users > 65 years with macrolide                                                                                                                                                                                                                                        | (1) Hospitalization for rhabdomyolysis<br>(2) hospitalization for acute kidney injury<br>(3) hospitalization for hyperkalemia | 75,858 vs 68,478                                                             | 74 ± 6     | 52.9 vs. 53.0 | 30 (days) | <b>(1) 2.17 (1.03 - 4.52)</b><br><b>(2) 1.83 (1.52 - 2.19)</b><br>(3) 1.32 (0.89 – 1.94)<br><b>(4) 1.57 (1.37 - 1.82)</b> | Absolute risk differences:<br>(1) 0.02 (0.01 - 0.03)<br>(2) 0.20 (0.14- 0.26)<br>(3) 0.02 (0.01 - 0.05)<br>(4) 0.25 (0.17 - 0.33)<br>Number of events: |

|                                                                                                                                                                                                                |                                                                                                                                                                                                  |                                                                                                                |                                                   |                             |               |              |                                                                                                                                                                                                                                                                                                                                         |                                                                                                                       |
|----------------------------------------------------------------------------------------------------------------------------------------------------------------------------------------------------------------|--------------------------------------------------------------------------------------------------------------------------------------------------------------------------------------------------|----------------------------------------------------------------------------------------------------------------|---------------------------------------------------|-----------------------------|---------------|--------------|-----------------------------------------------------------------------------------------------------------------------------------------------------------------------------------------------------------------------------------------------------------------------------------------------------------------------------------------|-----------------------------------------------------------------------------------------------------------------------|
| Discharge Abstract database, Ontario Health Insurance Plan database, and Registered persons database of Ontario) (NOS 7/9)                                                                                     | antibiotic co-prescription<br>Exposure: users of statin + clarithromycin or erythromycin vs users of statin + azithromycin                                                                       | (4) all-cause mortality                                                                                        |                                                   |                             |               |              |                                                                                                                                                                                                                                                                                                                                         | (1) 24 vs 10<br>(2) 347 vs 176<br>(3) 61 vs 42<br>(4) 529 vs 306                                                      |
| <b>Statins</b>                                                                                                                                                                                                 |                                                                                                                                                                                                  |                                                                                                                |                                                   |                             |               |              |                                                                                                                                                                                                                                                                                                                                         |                                                                                                                       |
| <b>In CAD patients (no 29)</b>                                                                                                                                                                                 |                                                                                                                                                                                                  |                                                                                                                |                                                   |                             |               |              |                                                                                                                                                                                                                                                                                                                                         |                                                                                                                       |
| Kulik et al <sup>29</sup><br>(USA, Medicare, Pennsylvania Pharmaceutical Assistance Contract for the Elderly program, and the New Jersey Pharmaceutical Assistance to the Aged and Disabled program) (NOS 7/9) | Observational population-based study<br>Population: patients ≥ 65 years old who had been hospitalized for acute MI or coronary revascularization<br>Exposure: users of statins vs nonusers       | New-onset AF                                                                                                   | 8,450 vs 20,638                                   | 76.6 ± 6.4 vs 78.8 ± 7.1    | 74.1 vs 72.2  | 3.8 (SD ± 3) | Adjusted HR in the entire cohort:<br><b>0.90 (0.85–0.96)</b><br>In CABG cohort: 0.96 (0.83 – 1.10)<br>In PCI cohort:<br><b>0.89 (0.82–0.96)</b><br>In MI cohort:<br><b>0.84 (0.76–0.92)</b>                                                                                                                                             |                                                                                                                       |
| Macchia et al <sup>35</sup><br>(Italy, Administrative database) (NOS 7/9)                                                                                                                                      | Observational retrospective cohort study<br>Population: patients discharged alive with a first diagnosis of MI treated with statins<br>Exposure: users of statins + n-3 PUFA vs users of statins | (1) All-cause death<br>(2) Death or MI<br>(3) Death or AF<br>(4) Death or congestive HF<br>(5) Death or stroke | 4,302 vs 7,230<br>(4,812 patients aged ≥70 years) | 63.8 ± 10.7 vs. 68.5 ± 10.4 | 24.6 vs. 33.3 | 4            | (1) <b>0.59 (0.52–0.66)</b><br>(2) 0.94 (0.96 – 1.02)<br>(3) <b>0.78 (0.71–0.86)</b><br>(4) <b>0.81 (0.74–0.88)</b><br>(5) <b>0.66 (0.59–0.74)</b><br>In paired-matched cohort:<br>(1) <b>0.63 (0.56–0.72)</b><br>(2) 0.95 (0.87 – 1.03)<br>(3) <b>0.82 (0.75–0.90)</b><br>(4) <b>0.86 (0.79–0.95)</b><br>(5) <b>0.65 (0.58 – 0.73)</b> | Number of events in paired-matched populations:<br>340 vs 539<br>804 vs 848<br>660 vs 805<br>684 vs 792<br>456 vs 662 |
| <b>In COPD patients (no 30)</b>                                                                                                                                                                                |                                                                                                                                                                                                  |                                                                                                                |                                                   |                             |               |              |                                                                                                                                                                                                                                                                                                                                         |                                                                                                                       |

|                                                                                                                                  |                                                                                                                                                                                       |                                  |                                                 |                                                    |              |   |                                                                                                                                                                                                                                                                                                                                                                                                           |                                                                                  |
|----------------------------------------------------------------------------------------------------------------------------------|---------------------------------------------------------------------------------------------------------------------------------------------------------------------------------------|----------------------------------|-------------------------------------------------|----------------------------------------------------|--------------|---|-----------------------------------------------------------------------------------------------------------------------------------------------------------------------------------------------------------------------------------------------------------------------------------------------------------------------------------------------------------------------------------------------------------|----------------------------------------------------------------------------------|
| Lawes et al <sup>31</sup><br>(New Zeland, Administrative database)<br>(NOS 7/9)                                                  | Retrospective cohort study<br>Population: patients with 50-80 years discharged from hospital with a first admission of COPD<br>Exposure: users of statins vs nonusers                 | All-cause mortality              | 596 vs 1,091; (patients aged 70-79: 354 vs 593) | 70.6                                               | 41.6 vs 51.5 | 4 | <b>2.22 (1.60 - 3.07)</b>                                                                                                                                                                                                                                                                                                                                                                                 |                                                                                  |
| <b>In women (no 31)</b>                                                                                                          |                                                                                                                                                                                       |                                  |                                                 |                                                    |              |   |                                                                                                                                                                                                                                                                                                                                                                                                           |                                                                                  |
| LaCroix et al <sup>30</sup><br>(USA, Women's Health Initiative Observational Study)<br>(NOS 4/9)                                 | Prospective Study<br>Population: women aged 65-79 years who did not have frailty at baseline<br>Exposure: users of statin vs nonusers                                                 | Intermediate frailty; Frail      | 2,122 vs 23,256                                 | 51.6% aged between 65-69; 48.4% aged between 70-79 | 100          | 3 | ORs compared to nonusers:<br>-for intermediate frailty women<br>0.99 (0.88-1.11)<br>-for frail women<br>1.00 (0.85-1.16)                                                                                                                                                                                                                                                                                  |                                                                                  |
| <b>Warfarin + potentially interacting drugs (no 32)</b>                                                                          |                                                                                                                                                                                       |                                  |                                                 |                                                    |              |   |                                                                                                                                                                                                                                                                                                                                                                                                           |                                                                                  |
| Vitry et al <sup>53</sup><br>(Australia, Australian Department of Veterans' Affairs administrative claims database)<br>(NOS 6/9) | Retrospective cohort study<br>Population: veterans aged ≥ 65 years who were new users of warfarin<br>Exposure: users of Warfarin + potentially interacting drugs vs users of warfarin | Bleeding-related hospitalization | 17,661                                          | 81.8 ± 4.4                                         | 36.2         | 4 | Overall incidence rate:<br><b>4.1 (3.7-4.6) per 100 person-year;</b><br><br>RRs compared to treatment with warfarin only:<br>-Low-dose aspirin<br>1.44 (1.00-2.07);<br>-NSAIDs<br>1.19 (0.90-1.59);<br>-Colecxib<br>1.07 (0.69-1.68)<br>-Clopidogrel<br><b>2.23 (1.48-3.36);</b><br>-Clopidogrel + aspirin<br><b>3.44 (1.28-9.23);</b><br>-NSAIDs + aspirin<br>1.01 (0.40-2.53);<br>-Clopidogrel + NSAIDs | Number of events for each drug; incidence rate for 100 person-year for each drug |

|  |  |  |  |  |  |  |                                                                                                                                                                                                                                                                                                                                |  |
|--|--|--|--|--|--|--|--------------------------------------------------------------------------------------------------------------------------------------------------------------------------------------------------------------------------------------------------------------------------------------------------------------------------------|--|
|  |  |  |  |  |  |  | 2.5 (0.88-7.10);<br>-Tramadol<br>2.37 (0.93-6.01);<br>-SSRIs<br>2.17 (0.81-5.78);<br>-Amiodarone<br><b>3.33 (1.38-8.00);</b><br>-Antibiotics<br><b>2.34 (1.55-3.54);</b><br>-Macrolides<br><b>3.07 (1.37-6.90);</b><br>-Trimethoprim or<br>cotrimoxazole<br><b>5.08 (2.00-12.88);</b><br>-Thyroid hormones<br>1.66 (0.66-4.16) |  |
|--|--|--|--|--|--|--|--------------------------------------------------------------------------------------------------------------------------------------------------------------------------------------------------------------------------------------------------------------------------------------------------------------------------------|--|

ACE: Angiotensin-Converting-Enzyme; ACS: Acute Coronary Syndromes; ADR: Adverse Drug Reaction; AF: Atrial Fibrillation; CardioV: CardioVascular; CABG: Coronary Artery Bypass Graft; CAD: Coronary Artery Disease; CCB: Calcium Channel Blocker; CerebroV: CerebroVascular; CKD: Chronic Kidney Disease; COPD: Chronic Obstructive Pulmonary Disease; CYP3A4: Cytochrome P450 3A4 ; GI: GastroIntestinal; HF: Heart Failure; HR: Hazard Ratio; INR: International Normalized Ratio; LAA: Long-Acting Anticholinergic; LABA: Long-Acting Beta-Agonist; MACE: Major Adverse Cardiac Events; MI: Myocardial Infraction; NOS: Newcastle Ottawa Scale; NSAID: NonSteroidal Anti-Inflammatory Drug; NSTE: Non-ST segment Elevation; OAC: Oral AntiCoagulant; OR: Odds Ratio; PCI: Percutaneous Coronary Intervention; PPI: Proton Pump Inhibitor; PUFA: PolyUnsaturated Fatty Acid; RR: Relative Risk; TCA: TriCyclic Antidepressants; UFH: UnFractionated Heparin; SSRI: Selective Serotonin Reuptake Inhibitor
